# Supplementary material for: Complement Activation via the Lectin and Alternative Pathway in Patients With Severe COVID-19
Source: Front Immunol. 2022 Feb 2;13:835156. doi: 10.3389/fimmu.2022.835156 (PMC8884149; doi:10.3389/fimmu.2022.835156)
Supplement: Supplementary file 4 [file Table_1.xlsx]

## Sheet: PAS - autolysis score kidney
specimen ID	field of view 1		field of view 2		field of view 3		field of view 4		field of view 5		total		study enrolement
	tubules	glomeruli	tubules	glomeruli	tubules	glomeruli	tubules	glomeruli	tubules	glomeruli	tubules	glomeruli	[I = inclusion; E = exclusion]
A-1	3	1	3	1	2	/	3	1	2	/	2 to 3	1	I
A-2	3	2	3	2	2	/	3	2	2	/	2 to 3	2	E
A-3	2	0	2	0	2	0	2	/	2	/	2	0	I
A-4	3	1	1	/	3	1	2	1	3	1	2	1	I
A-5	3	1	3	1	2	/	3	1	2	0	2 to 3	1	I
A-6	2	2	1	/	2	1	1	/	3	1	1 to 2	1	I
A-7	2	1	2	0	1	/	1	0	2	/	1 to 2	0 to 1	I
A-8	2	0	2	/	2	1	3	1	2	/	2	1	I
A-9	1	0	1	/	2	0	3	1	2	1	2	0 to 1	I
A-10	2	1	1	0	1	/	2	2	1	0	1 to 2	1	I
A-11	3	2	2	/	3	2	3	2	2	/	2 to 3	2	E
A-12	3	2	3	/	3	2	3	/	3	2	3	2	E
A-13	2	1	3	2	3	2	2	/	3	1	2 to 3	1 to 2	I
A-14	3	1	3	2	2	/	3	1	3	2	3	1 to 2	I
A-15	3	2	3	2	3	2	3	1	2	/	2 to 3	1 to 2	I
A-16	3	2	3	2	3	2	3	2	3	/	3	2	I
A-17	1	/	3	2	3	2	2	/	3	1	2 to 3	2	I
A-18	2	0	2	0	1	0	2	0	2	1	1 to 2	0	I
A-19	2	/	2	1	2	0	2	1	2	1	2	1	I
A-20	3	2	2	/	3	2	3	2	3	2	2 to 3	2	E
A-21	2	0	2	1	3	1	3	/	2	/	2 to 3	1	I
A-22	1	/	2	/	3	1	3	1	3	1	2 to 3	1	E
A-23	2	1	2	/	2	1	3	1	2	1	2	1	I
A-24	2	1	2	1	1	/	3	2	2	2	2	1 to 2	I
A-25	3	2	2	/	3	2	2	/	3	2	2 to 3	2	I
A-26	3	2	3	2	3	2	3	2	3	2	3	2	E
A-27	3	1	2	0	3	0	2	/	2	0	2 to 3	0 to 1	I
A-28											spleen		E
A-29											spleen		E
A-30	3	2	3	2	2	/	2	/	3	1	3	2	E
A-31	2	1	2	/	3	2	3	1	3	1	2 to 3	1	I
A-32	3	1	3	1	2	/	3	2	3	2	3	1 to 2	E
A-33	3	0	3	1	3	1	2	/	2	1	2 to 3	1	I
A-34	3	/	3	2	3	/	3	2	3	2	3	2	E
A-35	3	2	2	/	3	2	1	/	3	2	2 to 3	2	I
A-36	3	1	3	/	2	/	3	1	3	1	3	1	I
ER-1											2	1	I
ER-2											2 to 3	0 to 1	I
ER-3											2 to 3	1	I
ER-4											2	0	I
ER-5											1 to 2	0	I
ER-6											2 to 3	1	I
ER-7											3	1	I
ER-8											2	1	I
ER-9											2 to 3	0 to 1	I
ER-10											2 to 3	0	I
ER-11											3	0 to 1	I
ER-12											2 to 3	0 to 1	I
ER-13											2 to 3	0 to 1	I
ER-14											3	1	E
Ctrl-1	2	1	2	0	2	/	3	0	2	/	2	0	I
Ctrl-2	3	1	2	/	3	1	1	/	3	1	2 to 3	1	I
Ctrl-3	3	1	3	1	3	2	2	/	3	/	3	1 to 2	I
Ctrl-4	3	2	3	2	3	/	3	/	3	2	3	2	E
Ctrl-5	2	0	2	0	1	/	1	0	1	/	1	0	I
Ctrl-6	2	/	3	0	3	1	2	/	3	1	3	0 to 1	I
Ctrl-7	2	0	1	/	2	1	1	/	2	1	1 to 2	1	I
Ctrl-8	3	1	3	1	2	/	3	1	2	/	2 to 3	1	I
Ctrl-9	3	2	2	/	3	1	2	/	3	2	3	1 to 2	E
Ctrl-10	2	/	3	0	2	/	3	0	3	0	2 to 3	0	I
Ctrl-11	3	2	3	/	3	2	3	/	3	2	3	2	E

## Sheet: tissue injury
specimen ID	Pt.	lung	kidney
		lung injury score (LSI) [score 0-5]	glomerular sclerosis (GSI)			tubular injury (TSI)
			GSI points	number of glomeruli	mean GSI [score 0-4]	TSI points	fields of view	mean TSI [0-4]
A-1/-37	1	3	1	27	0.037037	28	16	1.75
A-3/-39	2	3	5	62	0.0806452	17	15	1.13333
A-4/-40	3	2	38	31	1.22581	13	16	0.8125
A-5/-41	4	2	19	30	0.633333	36	22	1.63636
A-6/-42	5	2	30	43	0.697674	20	18	1.11111
A-7/-43	6	3	55	18	3.05556	74	20	3.7
A-8/-44	7	3	50	39	1.28205	56	25	2.24
A-9/-45	8	2	7	39	0.179487	33	22	1.5
A-10/-46	9	1	11	42	0.261905	37	15	2.46667
A-13/-49	10	3	9	43	0.209302	34	23	1.47826
A-14/-50	11	3	20	55	0.363636	29	17	1.70588
A-15/-51	12	3	25	54	0.462963	34	18	1.88889
A-16/-52	13	2	35	40	0.875	35	17	2.05882
A-17/-53	14	4	4	45	0.0888889	20	12	1.66667
A-18/-54	15	4	26	40	0.65	42	20	2.1
A-19/-55	16	2	24	38	0.631579	36	16	2.25
A-21/-57	17	3	14	48	0.291667	25	15	1.66667
A-23/-59	18	4	30	22	1.36364	44	12	3.66667
A-24/-60	19	2	6	40	0.15	24	15	1.6
A-25/-61	20	3	7	46	0.152174	21	19	1.10526
A-27/-63	21	4	33	29	1.13793	40	13	3.07692
A-31/-67	22	3	90	39	2.30769	51	18	2.83333
A-33/-69	23	2	19	61	0.311475	40	19	2.10526
A-35/-71	24	2	17	51	0.333333	27	21	1.28571
A-36/-72	25	3	8	41	0.195122	30	22	1.36364
ER-1	26	2	20	47	0.425532	32	16	2
ER-2	27	3	39	30	1.3	34	12	2.83333
ER-3	28	2	20	30	0.666667	22	10	2.2
ER-4	29	4	7	32	0.21875	20	16	1.25
ER-5	30	2	10	50	0.2	14	16	0.875
ER-6	31	5	12	24	0.5	40	19	2.10526
ER-7	32	3	50	41	1.21951	50	16	3.125
ER-8	33	3	4	31	0.129032	25	16	1.5625
ER-9	34	5	33	37	0.891892	18	14	1.28571
ER-10	35	2	17	52	0.326923	24	17	1.41176
ER-11	36	3	9	40	0.225	30	20	1.5
ER-12	37	3	12	43	0.27907	22	14	1.57143
ER-13	38	4	3	20	0.15	34	18	1.88889
Ctrl-1	1	2	22	35	0.628571	38	19	2
Ctrl-2	2	1	8	33	0.242424	10	12	0.833333
Ctrl-3	3	2	3	46	0.0652174	14	22	0.636364
Ctrl-5	4	1	13	40	0.325	11	18	0.611111
Ctrl-6	5	2	33	39	0.846154	20	11	1.81818
Ctrl-7	6	1	3	34	0.0882353	3	12	0.25
Ctrl-8	7	3	8	54	0.148148	13	20	0.65
Ctrl-10	8	1	16	42	0.380952	23	24	0.958333

## Sheet: SARSCov-2 spike protein
specimen ID	Pt.	SARSCov-2 spike protein [0 = negative; 1 = positive]
		kidney	lung
A-1/-37	1	0	0
A-3/-39	2	0	0
A-4/-40	3	0	0
A-5/-41	4	0	1
A-6/-42	5	0	0
A-7/-43	6	0	1
A-8/-44	7	0	1
A-9/-45	8	0	0
A-10/-46	9	0	0
A-13/-49	10	0	0
A-14/-50	11	0	0
A-15/-51	12	0	specimen missing
A-16/-52	13	0	0
A-17/-53	14	0	0
A-18/-54	15	0	1
A-19/-55	16	0	0
A-21/-57	17	0	0
A-23/-59	18	0	1
A-24/-60	19	0	0
A-25/-61	20	0	0
A-27/-63	21	0	0
A-31/-67	22	0	0
A-33/-69	23	0	1
A-35/-71	24	0	0
A-36/-72	25	0	1
ER-1	26	0	0
ER-2	27	0	0
ER-3	28	0	0
ER-4	29	0	1
ER-5	30	0	0
ER-6	31	0	0
ER-7	32	0	0
ER-8	33	0	0
ER-9	34	0	0
ER-10	35	0	0
ER-11	36	0	0
ER-12	37	0	0
ER-13	38	0	0
Ctrl-1	1	0	0
Ctrl-2	2	0	0
Ctrl-3	3	0	0
Ctrl-5	4	0	0
Ctrl-6	5	0	0
Ctrl-7	6	0	0
Ctrl-8	7	0	0
Ctrl-10	8	0	0

## Sheet: C1q score
specimen ID	Pt.	kidney					lung
		compartments [score 0-3]				sum score [0-12]	compartments [score 0-3]					sum score [0-15]
		peritubular capillaries	arterial	glomerular	tubular basement membrane		alveolar septa	alveolar infiltrate	alveolar lumen	bronchioles	vessels
A-1/-37	1	0	0	0	0	0	0	0	0	0	0	0
A-3/-39	2	0	0	0	0	0	0	0	0	0	0	0
A-4/-40	3	1	1	1	1	4	0	0	0	0	0	5
A-5/-41	4	0	0	0	0	0	0	0	0	0	0	0
A-6/-42	5	1	0	0	1	2	0	0	0	0	0	3
A-7/-43	6	0	1	0	0	1	1	0	0	0	1	2
A-8/-44	7	0	0	0	0	0	0	0	0	0	0	0
A-9/-45	8	0	0	0	0	0	0	0	0	0	0	0
A-10/-46	9	0	0	0	0	0	0	0	0	0	0	0
A-13/-49	10	0	0	0	0	0	0	0	0	0	0	0
A-14/-50	11	0	0	0	0	0	0	0	0	0	0	0
A-15/-51	12	0	0	0	0	0	specimen missing
A-16/-52	13	0	0	0	0	0	0	0	0	0	0	0
A-17/-53	14	0	0	0	0	0	0	0	0	0	0	0
A-18/-54	15	0	0	0	0	0	0	0	0	0	0	0
A-19/-55	16	0	0	0	0	0	0	0	0	0	0	0
A-21/-57	17	0	0	0	0	0	0	0	0	0	0	0
A-23/-59	18	0	0	0	0	0	0	0	0	0	0	0
A-24/-60	19	0	0	0	0	0	0	0	0	0	0	0
A-25/-61	20	0	0	0	0	0	0	0	0	0	0	0
A-27/-63	21	0	0	0	0	0	0	0	0	0	0	0
A-31/-67	22	0	1	0	0	1	0	0	0	0	0	1
A-33/-69	23	0	0	0	0	0	0	0	0	0	0	0
A-35/-71	24	0	0	0	0	0	0	0	0	0	1	1
A-36/-72	25	0	0	0	0	0	2	1	0	0	2	3
ER-1	26	0	0	0	0	0	0	0	0	0	0	0
ER-2	27	1	1	1	1	4	0	1	0	0	0	6
ER-3	28	1	0	0	1	2	0	0	0	0	1	4
ER-4	29	0	0	0	0	0	0	0	0	0	0	0
ER-5	30	0	1	0	0	1	no alveolar tissue
ER-6	31	0	0	0	0	0	0	1	0	0	0	1
ER-7	32	0	0	0	0	0	0	0	0	0	0	0
ER-8	33	0	0	0	0	0	1	0	0	0	1	1
ER-9	34	1	0	0	1	2	no alveolar tissue
ER-10	35	1	1	0	0	2	0	1	0	0	1	4
ER-11	36	0	0	0	0	0	0	0	0	0	0	0
ER-12	37	0	1	0	0	1	1	0	0	0	0	1
ER-13	38	0	0	0	0	0	0	1	1	0	0	2
Ctrl-1	1	0	0	0	0	0	0	0	0	0	0	0
Ctrl-2	2	0	1	0	0	1	0	0	0	0	1	2
Ctrl-3	3	0	0	0	0	0	0	0	0	0	1	1
Ctrl-5	4	0	0	0	0	0	0	0	0	0	0	0
Ctrl-6	5	0	1	0	0	1	0	1	0	0	0	2
Ctrl-7	6	0	0	0	0	0	0	0	0	0	0	0
Ctrl-8	7	0	0	0	0	0	no alveolar tissue
Ctrl-10	8	0	0	0	0	0	0	0	0	0	0	0

## Sheet: C3c score
specimen ID	Pt.	kidney					lung
		compartments [score 0-3]				sum score [0-12]	compartments [score 0-3]					sum score [0-15]
		peritubular capillaries	arterial	glomerular	tubular basement membrane		alveolar septa	alveolar infiltrate	alveolar lumen	bronchioles	vessels
A-1/-37	1	1	1	1	1	4	0	0	0	0	1	1
A-3/-39	2	1	0	0	1	2	1	0	0	0	0	1
A-4/-40	3	2	1	1	1	5	1	0	0	0	0	1
A-5/-41	4	1	0	0	1	2	2	0	0	0	0	2
A-6/-42	5	1	0	0	1	2	1	0	0	0	0	1
A-7/-43	6	1	2	0	1	4	1	0	0	0	0	1
A-8/-44	7	0	1	0	1	2	0	0	0	0	0	0
A-9/-45	8	1	0	0	0	1	0	0	0	0	1	1
A-10/-46	9	1	0	0	1	2	0	0	0	0	0	0
A-13/-49	10	0	0	0	0	0	1	0	0	0	0	1
A-14/-50	11	0	0	0	0	0	2	0	0	0	1	3
A-15/-51	12	0	0	0	0	0	specimen missing
A-16/-52	13	0	0	0	0	0	1	0	0	0	0	1
A-17/-53	14	1	0	0	0	1	2	1	1	2	2	8
A-18/-54	15	0	0	0	0	0	0	0	0	0	0	0
A-19/-55	16	0	0	0	0	0	0	0	0	0	1	1
A-21/-57	17	2	0	0	1	3	0	0	0	1	0	1
A-23/-59	18	0	0	0	1	1	0	0	0	0	0	0
A-24/-60	19	1	0	0	1	2	1	0	0	0	1	2
A-25/-61	20	2	0	1	2	5	2	0	0	0	0	2
A-27/-63	21	2	0	1	2	5	3	0	2	0	0	5
A-31/-67	22	0	0	0	0	0	0	0	0	0	0	0
A-33/-69	23	0	0	0	0	0	0	0	0	0	0	0
A-35/-71	24	2	2	2	0	6	0	1	0	0	1	2
A-36/-72	25	2	0	0	1	3	3	0	0	0	1	4
ER-1	26	2	0	0	2	4	3	0	2	0	1	6
ER-2	27	2	2	2	2	8	0	1	0	0	1	2
ER-3	28	1	0	1	2	4	0	0	0	0	2	2
ER-4	29	2	1	1	2	6	1	1	0	0	0	2
ER-5	30	2	0	1	2	5	no alveolar tissue
ER-6	31	1	1	1	2	5	3	1	0	0	1	5
ER-7	32	2	2	2	1	7	0	2	0	0	1	3
ER-8	33	2	2	1	2	7	3	0	1	0	1	5
ER-9	34	1	2	1	2	6	no alveolar tissue
ER-10	35	2	1	1	2	6	2	2	0	0	2	6
ER-11	36	1	2	1	2	6	1	1	0	2	2	6
ER-12	37	1	2	1	1	5	3	1	0	2	1	7
ER-13	38	1	0	0	1	2	1	1	1	2	1	6
Ctrl-1	1	2	2	1	2	7	0	1	0	1	1	3
Ctrl-2	2	1	1	1	2	5	0	1	0	2	1	4
Ctrl-3	3	0	0	1	0	1	2	0	1	0	2	5
Ctrl-5	4	2	0	1	1	4	0	0	0	1	1	2
Ctrl-6	5	2	1	1	2	6	1	1	0	0	3	5
Ctrl-7	6	1	1	0	2	4	0	1	0	0	1	2
Ctrl-8	7	2	1	1	2	6	no alveolar tissue
Ctrl-10	8	1	0	0	2	3	0	1	0	0	1	2

## Sheet: MASP-2 score
specimen ID	Pt.	kidney					lung
		compartments [score 0-3]				sum score [0-12]	compartments [score 0-3]					sum score [0-15]
		peritubular capillaries (total)	arterial	glomerular	tubular basement membrane (total)		alveolar septa	alveolar infiltrate	alveolar lumen	bronchioles	vessels
A-1/-37	1	1	0	0	1.87	2.87	0	1	1	/	1	3
A-3/-39	2	0.4	1	0	0.93	2.33	3	2	2	3	3	13
A-4/-40	3	2.07	0	0	2	4.07	3	2	2	2	3	12
A-5/-41	4	1.53	0	0	1.93	3.46	3	2	2	3	2	12
A-6/-42	5	1.4	1	0	1.8	4.2	3	2	2	2	2	11
A-7/-43	6	1	0	0	0.93	1.93	3	3	1	2	3	12
A-8/-44	7	1.4	0	0	2.47	3.87	1	2	2	1	3	9
A-9/-45	8	0.73	1	0	2.07	3.8	0	3	2	3	2	10
A-10/-46	9	0.93	0	0	2	2.93	1	1	1	1	2	6
A-13/-49	10	0.93	1	0	1.87	3.8	3	2	3	0	2	10
A-14/-50	11	0.93	0	0	2.4	3.33	2	1	3	3	2	11
A-15/-51	12	0.2	0	0	0.33	0.53	specimen missing
A-16/-52	13	0.8	0	0	2.27	3.07	2	1	3	2	1	9
A-17/-53	14	0.93	0	0	1.6	2.53	2	1	3	1	2	9
A-18/-54	15	0.87	0	1	1.13	3	0	3	0	3	1	7
A-19/-55	16	0.8	0	0	1.73	2.53	2	3	2	2	1	10
A-21/-57	17	1	0	0	1.6	2.6	2	1	2	2	2	9
A-23/-59	18	0.47	1	0	2.73	4.2	0	3	1	3	1	8
A-24/-60	19	0.87	0	0	1.53	2.4	2	2	0	3	2	9
A-25/-61	20	0.93	0	0	1.07	2	3	0	2	0	1	6
A-27/-63	21	1.13	1	0	1.67	3.8	3	0	3	0	1	7
A-31/-67	22	0.53	0	0	3	3.53	2	0	3	0	2	7
A-33/-69	23	0.47	0	0	1.27	1.74	specimen missing
A-35/-71	24	0.8	0	0	1.93	2.73	1	2	0	2	3	8
A-36/-72	25	0.8	0	0	2.33	3.13	3	0	1	1	1	6
ER-1	26	0.8	0	0	1.6	2.4	2	0	2	1	1	6
ER-2	27	1.33	0	0	1.8	3.13	1	0	2	1	1	5
ER-3	28	0.67	0	0	1.47	2.14	2	0	0	1	1	4
ER-4	29	0.53	0	0	0.87	1.4	0	1	1	1	2	5
ER-5	30	0.33	1	0	0.73	2.06	no alveolar tissue
ER-6	31	1.07	1	0	2.27	4.34	3	0	3	3	1	10
ER-7	32	1	0	0	1.67	2.67	2	1	2	1	3	9
ER-8	33	0.87	0	0	0	0.87	3	2	2	1	1	9
ER-9	34	0.8	0	0	1.6	2.4	no alveolar tissue
ER-10	35	0.93	0	0	0.93	1.86	2	2	2	/	2	8
ER-11	36	0.87	0	0	1.27	2.14	2	1	2	2	2	9
ER-12	37	1	0	0	2	3	3	1	1	1	3	9
ER-13	38	0.93	0	0	1.53	2.46	3	1	2	3	1	10
Ctrl-1	1	0.13	0	0	0	0.13	0	2	0	1	2	5
Ctrl-2	2	0.07	0	0	0.13	0.2	0	1	0	3	2	6
Ctrl-3	3	0.33	0	0	0.2	0.53	0	0	0	0	0	0
Ctrl-5	4	0.07	0	1	0	1.07	0	2	0	1	2	5
Ctrl-6	5	0.07	0	0	0.07	0.14	1	1	2	/	2	6
Ctrl-7	6	0.13	0	1	0	1.13	1	1	0	/	1	3
Ctrl-8	7	0.4	0	0	0.13	0.53	no alveolar tissue
Ctrl-10	8	0.87	0	0	0.8	1.67	0	1	0	2	1	4
		peritubular capillaries [score 0-3]																tubular basement membrane [score 0-3]
fields of view		1	2	3	4	5	6	7	8	9	10	11	12	13	14	15	total	1	2	3	4	5	6	7	8	9	10	11	12	13	14	15	total
A-1/-37	1	1	1	1	1	1	1	1	1	1	2	0	1	1	1	1	1	2	2	2	1	2	2	1	1	3	2	2	2	2	1	3	1.87
A-3/-39	2	0	0	1	1	1	1	1	0	0	1	0	0	0	0	0	0.4	1	2	1	2	2	0	2	2	2	0	0	0	0	0	0	0.93
A-4/-40	3	2	2	2	3	2	2	2	1	2	3	2	2	2	2	2	2.07	2	2	2	1	1	0	2	2	3	3	3	2	3	2	2	2
A-5/-41	4	2	2	2	2	2	1	1	1	1	1	2	2	1	1	2	1.53	3	3	2	1	2	2	2	2	2	2	2	2	1	2	1	1.93
A-6/-42	5	1	1	2	1	1	1	1	2	1	1	1	2	2	2	2	1.4	2	1	2	1	2	2	2	2	2	1	2	2	2	2	2	1.8
A-7/-43	6	0	1	1	0	1	1	1	1	0	0	1	2	2	2	2	1	1	2	2	0	1	2	1	1	0	1	0	0	1	1	1	0.93
A-8/-44	7	1	2	1	1	1	1	2	1	1	1	2	2	2	1	2	1.4	2	2	2	2	2	3	2	3	3	2	3	3	2	3	3	2.47
A-9/-45	8	1	0	1	1	1	0	0	1	1	1	1	0	1	1	1	0.73	2	2	2	2	1	2	3	2	2	2	3	2	2	3	1	2.07
A-10/-46	9	1	1	2	1	0	1	0	1	1	1	1	1	1	1	1	0.93	2	3	2	2	2	2	2	1	2	2	2	2	2	2	2	2
A-13/-49	10	1	1	1	1	1	1	1	1	1	1	1	1	0	1	1	0.93	2	1	2	2	2	2	2	3	2	1	2	2	2	2	1	1.87
A-14/-50	11	1	1	1	1	1	2	0	1	0	1	1	1	1	1	1	0.93	2	3	2	3	2	2	3	3	2	3	3	2	2	2	2	2.4
A-15/-51	12	0	0	1	1	1	0	0	0	0	0	0	0	0	0	0	0.2	1	1	0	1	0	0	0	0	0	1	0	0	0	0	1	0.33
A-16/-52	13	1	1	1	1	1	1	0	0	1	1	1	1	1	0	1	0.8	3	2	2	2	2	3	2	2	2	3	2	2	3	2	2	2.27
A-17/-53	14	1	0	2	1	1	1	1	1	0	1	1	1	1	1	1	0.93	1	2	1	2	2	2	2	2	1	1	2	2	1	2	1	1.6
A-18/-54	15	1	0	1	2	1	1	1	1	1	1	1	0	1	1	0	0.87	0	0	1	2	2	2	2	1	2	1	0	1	0	1	2	1.13
A-19/-55	16	1	0	0	1	1	1	1	1	1	1	1	0	1	1	1	0.8	1	1	2	2	2	1	2	2	3	1	2	2	2	1	2	1.73
A-21/-57	17	1	1	1	1	1	1	1	1	1	1	1	1	1	1	1	1	1	2	2	1	2	2	1	2	1	2	1	1	2	2	2	1.6
A-23/-59	18	1	1	1	0	0	0	0	0	1	1	0	0	0	1	1	0.47	3	2	3	2	3	3	3	3	3	3	3	3	2	2	3	2.73
A-24/-60	19	0	1	1	1	1	0	1	1	0	1	1	1	2	1	1	0.87	1	1	1	2	2	1	1	2	1	2	2	2	2	2	1	1.53
A-25/-61	20	1	1	1	1	1	1	1	1	1	1	1	1	1	1	0	0.93	1	2	1	1	1	1	0	1	1	1	0	2	2	2	0	1.07
A-27/-63	21	1	2	1	1	1	0	1	1	1	2	1	1	1	2	1	1.13	1	2	1	2	2	2	1	2	2	2	1	2	2	2	1	1.67
A-31/-67	22	1	0	1	1	0	1	1	0	1	0	1	0	0	1	0	0.53	3	3	3	3	3	3	3	3	3	3	3	3	3	3	3	3
A-33/-69	23	0	1	0	1	1	1	0	0	0	0	1	1	0	0	1	0.47	1	2	1	0	2	1	0	1	1	2	1	1	2	2	2	1.27
A-35/-71	24	1	1	0	1	1	1	1	1	0	0	1	1	1	1	1	0.8	2	2	3	2	2	2	2	2	2	2	1	2	2	1	2	1.93
A-36/-72	25	1	1	1	0	1	1	1	1	1	1	0	1	1	0	1	0.8	2	2	3	2	2	2	1	3	3	2	2	3	2	3	3	2.33
ER-1	26	1	1	0	1	2	0	1	2	1	1	1	0	0	1	0	0.8	2	2	1	2	1	2	2	2	2	1	2	1	1	2	1	1.6
ER-2	27	2	1	1	2	1	1	1	2	1	1	2	2	1	1	1	1.33	1	1	2	1	2	2	2	2	2	2	2	2	2	2	2	1.8
ER-3	28	0	0	0	1	0	0	1	0	0	1	2	1	1	2	1	0.67	1	1	1	2	0	1	2	1	2	2	3	1	2	2	1	1.47
ER-4	29	1	1	1	0	0	0	1	1	1	0	0	0	2	0	0	0.53	1	1	2	2	0	1	0	1	1	1	1	1	1	0	0	0.87
ER-5	30	1	1	0	0	0	0	1	0	0	1	0	0	0	1	0	0.33	1	1	1	2	1	1	1	1	0	1	0	0	1	0	0	0.73
ER-6	31	0	1	0	2	0	1	1	2	1	2	2	1	0	1	2	1.07	0	2	2	2	3	2	3	2	3	3	3	2	2	3	2	2.27
ER-7	32	1	1	1	1	1	2	1	1	1	1	1	1	1	0	1	1	2	2	2	2	2	2	1	2	2	2	1	2	1	1	1	1.67
ER-8	33	1	2	2	2	0	0	2	0	1	1	0	2	0	0	0	0.87	0	0	0	0	0	0	0	0	0	0	0	0	0	0	0	0
ER-9	34	1	1	0	1	1	1	2	1	1	0	1	0	1	1	0	0.8	1	2	2	2	1	2	1	2	2	1	1	2	2	2	1	1.6
ER-10	35	2	1	1	1	0	1	2	1	1	2	1	1	0	0	0	0.93	1	2	2	2	1	2	0	2	1	0	0	1	0	0	0	0.93
ER-11	36	1	1	1	1	2	0	1	1	1	0	1	1	1	1	0	0.87	2	1	1	2	2	1	2	0	2	1	1	2	0	2	0	1.27
ER-12	37	2	1	1	1	1	1	1	1	1	1	1	2	1	0	0	1	2	2	2	2	2	2	2	2	2	2	2	3	2	2	1	2
ER-13	38	0	1	1	1	1	1	1	1	2	1	1	1	1	1	0	0.93	1	1	2	1	1	2	1	2	2	2	2	2	1	1	2	1.53
Ctrl-1	1	1	0	1	0	0	0	0	0	0	0	0	0	0	0	0	0.13	0	0	0	0	0	0	0	0	0	0	0	0	0	0	0	0
Ctrl-2	2	0	1	0	0	0	0	0	0	0	0	0	0	0	0	0	0.07	0	0	1	0	1	0	0	0	0	0	0	0	0	0	0	0.13
Ctrl-3	3	0	1	0	1	0	0	1	0	1	1	0	0	0	0	0	0.33	0	1	0	1	0	0	0	0	1	0	0	0	0	0	0	0.2
Ctrl-5	4	0	0	0	0	1	0	0	0	0	0	0	0	0	0	0	0.07	0	0	0	0	0	0	0	0	0	0	0	0	0	0	0	0
Ctrl-6	5	0	0	0	0	1	0	0	0	0	0	0	0	0	0	0	0.07	0	0	0	0	0	0	0	0	0	1	0	0	0	0	0	0.07
Ctrl-7	6	0	0	0	1	1	0	0	0	0	0	0	0	0	0	0	0.13	0	0	0	0	0	0	0	0	0	0	0	0	0	0	0	0
Ctrl-8	7	0	0	1	1	0	1	1	1	0	0	0	1	0	0	0	0.4	0	0	0	1	1	0	0	0	0	0	0	0	0	0	0	0.13
Ctrl-10	8	1	0	1	1	2	1	1	1	1	1	1	1	0	1	0	0.87	0	1	1	1	1	2	1	1	1	1	0	1	1	0	0	0.8

## Sheet: C3d score
specimen ID	Pt.	kidney					lung
		compartments [score 0-3]				sum score [0-12]	compartments [score 0-3]					sum score [0-15]
		peritubular capillaries (total)	arterial (total	glomerular (total)	tubular basement membrane (total)		alveolar septa	alveolar infiltrate	alveolar lumen	bronchioles	vessels
A-1/-37	1	1.6	1.47	1.47	1.07	5.61	1	0	3	/	1	5
A-3/-39	2	1.33	1.67	1.47	1.13	5.6	3	1	0	0	3	7
A-4/-40	3	2.27	2	1.93	2.07	8.27	3	0	0	1	2	6
A-5/-41	4	0.8	2.47	0.47	0.67	4.41	3	1	1	0	2	8
A-6/-42	5	1.87	2.2	0.6	1.73	6.4	2	1	3	0	2	8
A-7/-43	6	0.73	2.2	2.67	1.2	6.8	3	2	3	2	3	13
A-8/-44	7	2.07	2.53	1.6	1.87	8.07	0	0	0	0	1	1
A-9/-45	8	1.4	2.4	0.13	1.27	5.2	2	1	3	0	2	8
A-10/-46	9	1.53	2.2	0.33	0.8	4.86	2	0	2	1	3	8
A-13/-49	10	2	2.4	0.53	1.2	6.13	2	1	1	0	1	5
A-14/-50	11	1.6	2.6	0.73	1.47	6.4	2	1	3	/	2	8
A-15/-51	12	1.67	2.27	0.87	1.53	6.34	specimen missing
A-16/-52	13	2	2.8	0.73	1.93	7.46	2	0	1	/	2	5
A-17/-53	14	0.87	2.6	1.13	1.47	6.07	2	1	3	1	2	9
A-18/-54	15	1.33	2.07	0.8	1.4	5.6	0	1	0	1	2	4
A-19/-55	16	1.53	2.27	1	1.6	6.4	1	1	2	1	2	7
A-21/-57	17	1.8	2.67	1.47	1.6	7.54	2	1	3	2	2	10
A-23/-59	18	2.07	2.73	2.2	2.67	9.67	0	2	0	1	1	4
A-24/-60	19	2.07	2.6	0.73	1.4	6.8	3	0	1	1	2	7
A-25/-61	20	1.33	2.67	1.73	2.07	7.8	3	1	2	0	2	8
A-27/-63	21	1.87	2.6	2.07	1.93	8.47	3	1	1	0	2	7
A-31/-67	22	1.67	2.93	1.6	1.8	8	2	1	3	0	1	7
A-33/-69	23	2.07	1.4	0.47	1.67	5.61	1	1	1	1	2	6
A-35/-71	24	2	2.53	0.53	2	7.06	3	1	0	/	2	6
A-36/-72	25	2.2	2.33	0.87	1.93	7.33	3	0	1	0	2	6
ER-1	26	0.4	0.93	0.33	1.07	2.73	1	0	1	0	1	3
ER-2	27	1.13	2.6	1.73	1.67	7.13	1	0	0	0	2	3
ER-3	28	0.33	0.8	0.86	0.6	2.59	0	0	0	0	1	4
ER-4	29	1.67	1.8	0.33	1.4	5.2	2	0	1	1	2	6
ER-5	30	1.87	2	0.4	1.67	5.94	no alveolar tissue
ER-6	31	2.07	2.27	0.93	1.27	6.54	1	0	0	0	0	1
ER-7	32	1.8	2.47	1.33	2.27	7.87	0	2	2	0	2	6
ER-8	33	1.8	2.47	0.6	1.07	5.94	3	1	2	1	2
ER-9	34	1.8	2.87	1.47	0.8	6.94	no alveolar tissue
ER-10	35	1.6	1.47	1.07	1.13	5.27	2	2	0	/	2	6
ER-11	36	2.13	2.33	0.2	1.33	5.99	2	1	1	1	3	8
ER-12	37	1.87	2.73	0.93	1.13	6.66	2	0	0	0	1	3
ER-13	38	no renal tissue					2	1	2	/	3	8
Ctrl-1	1	0.67	2.47	1.67	0.73	5.54	0	2	2	0	2	6
Ctrl-2	2	0.67	2.6	0.27	1.13	4.67	0	2	1	1	2	6
Ctrl-3	3	0.13	1.73	0.2	0.2	2.26	0	0	1	0	1	2
Ctrl-5	4	0.2	1.73	0.33	0.27	2.53	0	1	0	1	1	3
Ctrl-6	5	0.6	1	1.67	0.33	3.6	0	1	0	1	1	3
Ctrl-7	6	0.8	2.47	0.87	1.53	5.67	0	1	0	/	2	3
Ctrl-8	7	0.6	1.93	0.47	0.4	3.4	no alveolar tissue
Ctrl-10	8	0.47	1.67	1.67	0.8	4.61	0	1	0	0	1	2
		peritubular capillaries [score 0-3]																arterial [score 0-3]																glomerular [score 0-3]
fields of view		1	2	3	4	5	6	7	8	9	10	11	12	13	14	15	total	1	2	3	4	5	6	7	8	9	10	11	12	13	14	15	total	1	2	3	4	5	6	7	8	9	10	11	12	13	14	15	total
A-1/-37	1	2	2	0	2	2	0	1	3	2	2	2	0	2	2	2	1.6	0	1	2	1	2	2	1	2	2	1	2	2	2	1	1	1.47	2	2	1	1	1	2	1	1	2	2	2	2	1	1	1	1.47
A-3/-39	2	1	1	1	1	2	0	2	1	1	2	2	1	2	1	2	1.33	2	1	2	2	3	1	1	1	2	1	1	3	1	2	2	1.67	1	2	2	1	0	2	1	2	1	2	1	2	1	2	2	1.47
A-4/-40	3	3	2	2	2	3	2	2	2	3	3	2	2	2	3	1	2.27	1	2	3	1	2	1	3	2	3	2	2	2	2	1	3	2	2	2	2	3	2	2	2	1	2	1	3	2	2	1	2	1.93
A-5/-41	4	0	1	0	0	0	0	0	0	2	1	1	2	1	2	2	0.8	2	2	3	2	3	2	2	2	3	2	3	3	3	2	3	2.47	2	0	1	0	0	0	1	0	1	0	1	0	0	0	1	0.47
A-6/-42	5	1	2	1	1	1	2	2	3	2	2	2	3	2	2	2	1.87	2	2	2	2	3	2	3	1	2	2	3	2	3	2	2	2.2	1	0	1	0	0	1	0	0	0	1	1	2	1	1	0	0.6
A-7/-43	6	2	0	0	1	0	2	1	1	0	0	1	1	0	0	2	0.73	2	3	2	2	3	2	2	2	3	2	3	2	2	1	2	2.2	2	3	3	3	3	3	2	3	2	3	2	2	3	3	3	2.67
A-8/-44	7	2	2	2	2	2	2	1	2	2	2	2	3	2	2	3	2.07	1	3	3	2	3	2	3	3	2	3	2	3	2	3	3	2.53	1	2	3	2	1	1	2	1	1	3	1	1	2	1	2	1.6
A-9/-45	8	1	2	1	1	2	1	0	2	2	2	2	2	1	1	1	1.4	2	2	3	2	1	2	3	3	3	3	2	2	3	2	3	2.4	0	0	0	1	0	0	0	0	0	0	0	0	1	0	0	0.13
A-10/-46	9	2	1	1	1	1	2	2	1	1	2	1	2	2	2	2	1.53	1	3	3	3	1	3	2	2	2	2	3	2	2	2	2	2.2	0	1	0	1	0	0	0	0	1	0	0	0	1	1	0	0.33
A-13/-49	10	2	1	2	2	2	2	2	1	2	2	3	1	3	3	2	2	2	3	2	3	2	2	2	3	3	2	3	2	2	2	3	2.4	1	0	1	0	1	0	1	1	0	1	0	0	1	0	1	0.53
A-14/-50	11	1	1	1	1	1	2	2	2	2	1	2	2	2	2	2	1.6	3	2	3	2	3	2	3	2	3	2	3	2	3	3	3	2.6	2	2	1	1	0	1	1	1	0	0	0	1	0	1	0	0.73
A-15/-51	12	1	1	1	2	2	1	2	2	1	2	2	2	3	1	2	1.67	1	3	2	2	3	3	2	2	2	3	2	2	2	2	3	2.27	2	2	1	0	1	1	1	0	0	0	1	2	2	0	0	0.87
A-16/-52	13	2	2	2	2	2	2	2	2	2	2	2	2	2	2	2	2	3	3	2	3	3	3	3	3	3	2	3	3	3	3	2	2.8	1	1	0	1	1	0	1	1	0	1	0	1	1	1	1	0.73
A-17/-53	14	1	0	1	0	1	1	1	1	1	2	0	1	1	1	1	0.87	2	2	3	3	2	2	3	2	3	3	3	3	3	2	3	2.6	1	0	1	1	1	1	1	2	1	1	1	2	2	1	1	1.13
A-18/-54	15	1	1	1	1	1	1	2	1	2	2	1	1	2	2	1	1.33	2	1	3	2	3	1	2	2	2	2	2	3	2	2	2	2.07	1	0	2	1	1	1	1	0	0	0	1	0	1	2	1	0.8
A-19/-55	16	1	2	2	1	1	2	3	2	1	1	2	1	1	1	2	1.53	2	2	2	2	3	2	3	2	3	2	3	2	2	2	2	2.27	1	0	1	0	1	1	1	2	1	1	1	2	1	1	1	1
A-21/-57	17	1	2	1	2	2	2	2	2	2	2	2	1	1	2	3	1.8	3	2	2	3	3	3	3	2	3	3	3	2	3	2	3	2.67	1	2	1	1	2	2	2	0	2	0	2	1	2	2	2	1.47
A-23/-59	18	2	2	3	2	2	2	2	2	2	2	2	2	2	2	2	2.07	3	2	2	2	2	3	3	3	3	3	3	3	3	3	3	2.73	2	3	2	2	2	2	2	2	2	2	3	2	3	2	2	2.2
A-24/-60	19	2	2	2	1	2	2	2	3	1	3	2	2	3	2	2	2.07	2	2	3	2	3	3	3	2	2	3	3	3	2	3	3	2.6	0	1	1	1	0	1	1	0	0	1	1	2	1	0	1	0.73
A-25/-61	20	1	0	2	1	1	2	2	1	1	1	2	3	1	1	1	1.33	2	3	3	2	2	3	3	3	3	3	3	3	2	2	3	2.67	2	2	2	2	2	3	3	2	2	1	2	1	1	0	1	1.73
A-27/-63	21	1	1	1	2	2	1	2	2	2	2	2	3	3	2	2	1.87	1	3	2	3	2	2	2	3	3	3	3	3	3	3	3	2.6	2	3	3	2	2	2	3	3	2	2	2	2	1	1	1	2.07
A-31/-67	22	1	1	2	2	2	2	2	2	1	2	2	1	1	2	2	1.67	2	3	3	3	3	3	3	3	3	3	3	3	3	3	3	2.93	1	2	2	2	1	1	1	2	1	1	2	3	1	1	3	1.6
A-33/-69	23	1	1	2	2	2	2	2	2	2	2	3	3	2	2	3	2.07	1	1	2	1	1	1	1	1	2	2	1	2	2	1	2	1.4	1	1	0	0	1	1	0	0	1	1	0	1	0	0	0	0.47
A-35/-71	24	2	2	1	1	3	1	3	1	3	2	2	2	2	2	3	2	3	3	3	2	3	2	3	2	3	3	3	2	2	2	2	2.53	1	1	1	1	0	0	0	1	1	0	0	0	1	1	0	0.53
A-36/-72	25	2	2	2	1	2	2	2	2	3	3	2	3	3	2	2	2.2	2	2	2	2	3	2	2	3	2	2	3	3	2	2	3	2.33	1	1	1	1	2	1	0	1	2	1	1	0	1	0	0	0.87
ER-1	26	0	1	1	0	0	1	0	1	0	1	0	0	0	0	1	0.4	2	1	1	1	1	1	1	2	0	1	1	0	0	1	1	0.93	0	0	0	1	1	2	1	0	0	0	0	0	0	0	0	0.33
ER-2	27	1	1	2	1	1	1	1	1	2	2	2	1	0	1	0	1.13	3	2	3	2	2	2	3	3	3	2	2	3	3	3	3	2.6	2	2	2	2	1	3	1	2	2	1	2	2	1	2	1	1.73
ER-3	28	0	0	0	0	0	0	0	0	0	1	1	1	1	1	0	0.33	0	0	0	0	0	1	0	1	1	1	1	2	2	2	1	0.8	1	2	1	1	0	1	0	very little renal tissue								0.86
ER-4	29	2	0	2	1	2	2	2	3	2	2	2	2	1	1	1	1.67	2	2	1	2	2	1	2	2	2	2	1	2	2	2	2	1.8	1	0	0	0	1	0	1	1	0	0	0	0	0	0	1	0.33
ER-5	30	2	2	2	2	2	2	2	1	2	1	2	2	2	2	2	1.87	1	2	2	2	3	2	2	2	2	2	1	2	2	3	2	2	1	0	1	1	1	1	0	0	0	0	0	0	0	0	1	0.4
ER-6	31	2	2	2	2	2	2	2	2	2	3	2	2	2	2	2	2.07	2	1	3	2	3	2	2	1	2	3	3	2	3	3	2	2.27	0	0	1	1	0	2	3	2	0	1	1	0	0	2	1	0.93
ER-7	32	1	2	1	2	2	2	2	1	2	2	2	2	2	2	2	1.8	2	2	1	3	3	3	2	3	3	2	2	2	3	3	3	2.47	2	1	1	1	1	0	2	1	1	3	2	1	1	1	2	1.33
ER-8	33	1	2	2	2	2	3	1	1	2	2	1	2	2	2	2	1.8	3	2	3	3	3	2	2	3	2	2	3	3	2	2	2	2.47	0	1	0	1	1	1	1	0	0	1	1	0	1	0	1	0.6
ER-9	34	1	1	2	2	2	2	2	2	2	2	2	2	1	2	2	1.8	3	2	3	3	3	3	3	3	3	3	2	3	3	3	3	2.87	1	1	2	2	1	1	2	2	2	1	1	2	1	2	1	1.47
ER-10	35	1	1	2	2	2	1	1	2	3	1	1	1	1	2	3	1.6	1	2	2	2	1	2	1	1	2	2	1	2	1	1	1	1.47	1	0	1	1	1	2	1	0	1	1	1	1	2	2	1	1.07
ER-11	36	3	3	2	2	2	2	2	2	2	3	2	1	1	3	2	2.13	2	3	2	2	3	1	2	2	3	2	2	2	3	3	3	2.33	0	0	0	1	1	0	0	0	0	0	0	0	0	1	0	0.2
ER-12	37	2	2	2	2	2	1	1	2	2	2	2	2	2	2	2	1.87	3	2	3	3	3	3	2	2	3	3	3	2	3	3	3	2.73	1	1	1	1	0	1	1	1	1	1	1	1	1	1	1	0.93
ER-13	38	no renal tissue																no renal tissue																no renal tissue
Ctrl-1	1	0	1	0	1	1	1	1	2	1	1	0	1	0	0	0	0.67	2	2	3	2	3	3	3	3	2	2	3	3	2	3	1	2.47	2	1	2	2	2	2	1	1	2	2	1	2	1	2	2	1.67
Ctrl-2	2	2	1	0	0	0	1	1	1	1	0	1	0	1	0	1	0.67	3	3	1	3	2	2	3	2	3	3	3	2	3	3	3	2.6	0	0	1	0	0	0	1	0	0	0	1	0	0	0	1	0.27
Ctrl-3	3	1	0	0	0	0	0	0	0	1	0	0	0	0	0	0	0.13	1	2	2	1	2	3	2	1	1	2	1	1	2	3	2	1.73	0	0	1	0	0	0	0	1	0	0	0	0	0	0	1	0.2
Ctrl-5	4	0	0	0	0	0	1	0	0	1	0	0	0	1	0	0	0.2	2	1	2	3	3	0	2	2	1	2	2	2	1	1	2	1.73	1	0	0	0	1	1	0	1	0	0	0	0	1	0	0	0.33
Ctrl-6	5	1	0	0	1	1	1	0	1	0	2	0	0	1	1	0	0.6	1	1	1	1	1	0	1	1	2	1	2	1	1	0	1	1	1	2	2	2	2	2	1	2	2	2	1	1	2	2	1	1.67
Ctrl-7	6	2	2	1	2	2	0	0	0	0	0	0	0	2	1	0	0.8	3	3	2	2	3	3	3	2	2	3	1	2	2	3	3	2.47	0	0	1	1	1	2	2	0	1	1	0	0	1	2	1	0.87
Ctrl-8	7	0	0	1	0	0	0	0	0	0	1	1	0	2	2	2	0.6	2	1	1	2	3	2	1	2	2	2	3	2	2	2	2	1.93	1	0	1	0	1	0	1	0	0	0	1	0	0	1	1	0.47
Ctrl-10	8	0	0	0	2	2	2	2	2	2	1	2	2	2	1	2	0.47	1	2	2	1	1	2	2	2	2	1	2	2	1	2	2	1.67	2	2	2	1	1	1	2	2	1	2	2	2	2	2	1	1.67
[truncated: 16 more columns]

## Sheet: C5b-9 score
specimen ID	Pt.	kidney					lung
		compartments [score 0-3]				sum score [0-12]	compartments [score 0-3]					sum score [0-15]
		peritubular capillaries (total)	arterial (total	glomerular (total)	tubular basement membrane (total)		alveolar septa	alveolar infiltrate	alveolar lumen	bronchioles	vessels
A-1/-37	1	1.4	2.33	2.07	2.07	7.87	0	0	0	0	0	0
A-3/-39	2	1.47	1.4	0.47	1.8	5.14	2	0	1	0	1	4
A-4/-40	3	2.33	2.6	2.27	2.8	10	2	0	1	0	2	5
A-5/-41	4	1.8	2.13	0.93	2.87	7.73	1	0	1	0	1	3
A-6/-42	5	2.2	2.8	2.2	2.4	9.6	1	0	0	0	1	2
A-7/-43	6	1.33	1.33	1.67	2.07	6.4	2	0	0	0	1	3
A-8/-44	7	1.2	2	0.53	1.8	5.53	1	1	0	0	1	3
A-9/-45	8	0.73	1.67	0.27	1.87	4.54	0	0	0	0	1	1
A-10/-46	9	2.27	1.87	1.2	2.4	7.74	0	0	0	0	0	0
A-13/-49	10	1.47	1.8	0.53	2.47	6.27	1	0	0	0	1	2
A-14/-50	11	1.73	1.6	0.47	2.27	6.07	2	0	1	0	1	4
A-15/-51	12	0	0	0	0.2	0.2	specimen missing
A-16/-52	13	1.53	2.27	1	1.8	6.6	2	0	1	0	2	5
A-17/-53	14	0.87	2	0.4	2.07	5.34	2	1	1	0	2	6
A-18/-54	15	0.67	0.07	0	0.8	1.54	1	0	0	0	1	2
A-19/-55	16	0.07	0	0	0.13	0.2	2	2	0	0	0	4
A-21/-57	17	1.33	1.6	0.47	1.67	5.07	2	0	0	0	1	3
A-23/-59	18	1.67	0.67	0.6	2.47	5.41	1	2	0	0	2	5
A-24/-60	19	1.53	1.33	0.47	2.2	5.53	2	0	0	0	2	4
A-25/-61	20	1.2	1.73	0.4	1.93	5.26	2	0	0	0	1	3
A-27/-63	21	1.47	2.53	1.33	2.33	7.66	2	0	1	0	0	3
A-31/-67	22	1.47	2.47	2.13	2.73	8.8	1	1	1	0	2	5
A-33/-69	23	1.33	0.33	0	1.93	3.59	2	0	0	0	1	3
A-35/-71	24	1.87	2.8	2.4	2.8	9.87	2	2	0	0	2	6
A-36/-72	25	1.4	2.07	0.67	2.13	6.27	2	0	0	0	1	3
ER-1	26	1.8	1.67	1.87	2.33	7.67	3	0	1	0	2	6
ER-2	27	2.27	2.87	2.6	2.6	10.34	1	1	0	0	3	5
ER-3	28	2.33	2	1.13	2.07	7.53	1	0	0	0	3	4
ER-4	29	1.07	2.47	0.93	2.2	6.67	1	0	0	0	0
ER-5	30	0.87	2.33	1.27	1.73	6.2	no alveolar tissue
ER-6	31	2.4	2.93	2.47	2.87	10.67	1	0	1	0	1	3
ER-7	32	1.87	2.87	2.27	2.33	9.34	2	0	0	0	3	5
ER-8	33	1.8	2.47	1.13	1.73	7.13	2	1	2	0	2	7
ER-9	34	1.6	2.73	1.93	1.93	8.19	no alveolar tissue
ER-10	35	1.13	1.8	0.33	2.07	5.33	2	1	0	0	2	5
ER-11	36	2	2.93	1.67	2.07	8.67	1	0	0	0	2	3
ER-12	37	2.2	2.87	0.93	2.07	8.07	3	0	0	0	2	5
ER-13	38	1.27	2	1.53	1.87	6.67	2	0	1	0	2	5
Ctrl-1	1	1.4	2.6	1.47	2.33	7.8	0	2	0	0	1	3
Ctrl-2	2	1.6	2.47	1.33	2	7.4	0	1	0	0	1	2
Ctrl-3	3	0.47	0.93	0.2	1.27	2.87	0	2	0	0	2	4
Ctrl-5	4	0.4	1.53	0.13	1.33	3.39	0	0	0	0	2	2
Ctrl-6	5	1.2	2.13	1.33	2.13	6.79	1	2	1	0	2	6
Ctrl-7	6	0.07	0.8	0	0.33	1.2	0	0	0	0	1	1
Ctrl-8	7	1.13	1.6	1.33	1.67	5.73	no alveolar tissue
Ctrl-10	8	1.6	2.13	0.93	1.73	6.39	0	2	0	0	2	4
		peritubular capillaries [score 0-3]																arterial [score 0-3]																glomerular [score 0-3]
fields of view		1	2	3	4	5	6	7	8	9	10	11	12	13	14	15	total	1	2	3	4	5	6	7	8	9	10	11	12	13	14	15	total	1	2	3	4	5	6	7	8	9	10	11	12	13	14	15	total
A-1/-37	1	1	1	1	1	1	2	2	2	2	1	1	1	1	2	2	1.4	1	2	2	3	3	3	2	2	2	2	3	2	3	3	2	2.33	2	2	2	2	2	2	3	2	2	2	2	2	2	2	2	2.07
A-3/-39	2	1	2	1	1	1	1	2	2	1	2	2	2	1	2	1	1.47	1	2	1	2	2	1	2	2	1	1	1	2	1	1	1	1.4	1	0	0	0	1	0	0	0	1	1	1	0	1	1	0	0.47
A-4/-40	3	2	2	3	2	2	2	2	3	3	2	3	2	3	2	2	2.33	2	2	3	2	3	3	2	3	2	3	3	2	3	3	3	2.6	2	3	2	3	2	3	2	2	3	2	3	3	2	1	1	2.27
A-5/-41	4	2	2	2	2	2	2	1	2	1	1	2	2	2	2	2	1.8	2	2	2	2	2	2	2	3	2	2	2	2	2	3	2	2.13	1	2	1	1	1	1	1	1	1	1	1	1	1	0	0	0.93
A-6/-42	5	2	1	2	2	2	2	3	2	2	3	2	2	2	3	3	2.2	2	3	3	3	3	2	3	2	3	3	3	3	3	3	3	2.8	2	2	3	2	2	2	3	2	3	2	2	1	3	2	2	2.2
A-7/-43	6	1	1	1	1	2	1	2	2	1	2	1	1	1	1	2	1.33	2	2	2	1	1	2	2	1	1	1	1	2	1	0	1	1.33	2	2	2	2	3	2	1	2	1	2	2	0	1	1	2	1.67
A-8/-44	7	1	0	1	1	1	1	1	1	1	2	1	2	2	2	1	1.2	1	1	3	2	2	3	3	2	3	3	2	2	1	1	1	2	1	1	2	1	0	1	0	1	0	0	1	0	0	0	0	0.53
A-9/-45	8	0	1	1	1	1	1	2	0	1	1	0	1	1	0	0	0.73	1	2	2	3	3	2	1	2	1	2	1	1	1	2	1	1.67	0	0	1	0	1	0	0	1	0	0	0	0	1	0	0	0.27
A-10/-46	9	3	3	3	3	3	2	2	2	2	2	2	2	2	1	2	2.27	2	3	3	3	2	1	2	1	2	1	2	1	2	2	1	1.87	3	3	3	3	2	0	1	0	1	0	1	0	0	1	0	1.2
A-13/-49	10	1	2	2	1	2	2	1	1	1	1	2	2	1	1	2	1.47	2	2	1	1	1	2	3	2	2	2	2	2	2	1	2	1.8	1	0	1	1	0	0	1	0	1	1	0	0	0	1	1	0.53
A-14/-50	11	2	2	2	2	2	2	1	1	1	2	2	2	2	2	1	1.73	1	1	2	1	2	1	1	0	1	2	2	2	3	2	3	1.6	1	0	0	1	1	0	1	1	0	1	0	0	0	0	1	0.47
A-15/-51	12	0	0	0	0	0	0	0	0	0	0	0	0	0	0	0	0	0	0	0	0	0	0	0	0	0	0	0	0	0	0	0	0	0	0	0	0	0	0	0	0	0	0	0	0	0	0	0	0
A-16/-52	13	1	1	2	2	1	1	1	1	2	2	1	2	2	2	2	1.53	2	2	2	2	2	1	3	2	3	3	2	3	2	2	3	2.27	1	0	1	3	1	3	0	1	0	1	0	3	0	1	0	1
A-17/-53	14	1	1	1	2	1	1	1	1	1	1	1	0	0	1	0	0.87	2	2	3	2	2	2	2	2	2	3	2	2	2	1	1	2	2	0	0	1	1	0	1	0	1	0	0	0	0	0	0	0.4
A-18/-54	15	0	0	0	0	0	0	0	0	1	1	2	2	1	2	1	0.67	0	0	0	0	0	0	0	0	0	0	0	1	0	0	0	0.07	0	0	0	0	0	0	0	0	0	0	0	0	0	0	0	0
A-19/-55	16	0	0	0	0	1	0	0	0	0	0	0	0	0	0	0	0.07	0	0	0	0	0	0	0	0	0	0	0	0	0	0	0	0	0	0	0	0	0	0	0	0	0	0	0	0	0	0	0	0
A-21/-57	17	2	1	1	1	1	1	1	1	2	2	1	2	2	1	1	1.33	1	2	1	1	2	1	1	1	2	3	1	3	2	1	2	1.6	0	0	1	1	0	0	0	1	1	1	0	1	0	0	1	0.47
A-23/-59	18	2	2	1	2	2	1	2	1	1	2	1	2	2	2	2	1.67	1	2	2	1	1	2	1	0	0	0	0	0	0	0	0	0.67	0	0	1	2	0	1	1	1	1	1	0	1	0	0	0	0.6
A-24/-60	19	1	1	1	2	1	1	2	2	2	1	2	2	2	1	2	1.53	1	2	1	2	2	1	1	1	1	1	2	2	1	1	1	1.33	0	2	0	1	1	1	0	1	0	1	0	0	0	0	0	0.47
A-25/-61	20	1	2	1	1	1	1	1	2	1	0	1	1	1	2	2	1.2	1	2	1	2	2	2	1	1	2	2	2	2	2	2	2	1.73	0	0	0	0	0	1	0	0	0	0	1	1	2	1	0	0.4
A-27/-63	21	1	1	1	2	1	2	1	2	2	2	1	2	1	1	2	1.47	3	3	3	3	3	3	3	3	3	2	3	1	1	2	2	2.53	2	2	2	2	2	1	2	1	1	1	0	0	1	1	2	1.33
A-31/-67	22	1	1	2	1	1	1	1	2	1	2	1	2	2	2	2	1.47	2	2	2	3	2	3	3	3	3	2	2	3	2	3	2	2.47	2	2	3	2	2	2	3	1	2	3	2	2	2	2	2	2.13
A-33/-69	23	1	1	2	1	1	1	2	1	2	0	2	1	2	2	1	1.33	2	0	0	2	1	0	0	0	0	0	0	0	0	0	0	0.33	0	0	0	0	0	0	0	0	0	0	0	0	0	0	0	0
A-35/-71	24	1	1	2	2	2	2	2	2	2	2	2	2	2	2	2	1.87	2	2	3	3	3	3	3	3	3	3	3	3	3	3	2	2.8	2	3	2	3	1	2	2	3	2	3	2	3	2	3	3	2.4
A-36/-72	25	1	1	1	2	2	1	1	1	1	1	2	2	1	2	2	1.4	2	2	3	3	2	2	2	2	3	2	2	1	2	1	2	2.07	0	3	0	1	1	0	1	0	0	1	0	1	0	1	1	0.67
ER-1	26	2	2	2	2	2	2	1	2	2	2	2	1	2	2	1	1.8	1	2	2	2	1	1	2	2	2	2	1	2	2	2	1	1.67	2	1	2	3	2	3	2	1	2	2	1	2	2	1	2	1.87
ER-2	27	2	2	2	2	2	3	2	3	2	3	2	2	3	2	2	2.27	3	3	3	3	3	3	3	3	3	2	3	3	3	2	3	2.87	2	3	3	2	3	3	3	3	2	3	3	2	2	3	2	2.6
ER-3	28	3	3	2	2	2	2	2	3	2	2	2	3	3	2	2	2.33	1	2	2	3	2	2	2	2	little renal tissue							2	1	1	2	0	1	1	2	1	little renal tissue							1.13
ER-4	29	0	1	1	1	1	2	1	1	1	0	0	2	2	1	2	1.07	2	2	3	2	2	3	3	3	2	2	3	3	2	2	3	2.47	0	1	0	1	0	1	0	0	2	2	1	2	1	1	2	0.93
ER-5	30	1	1	2	1	1	1	0	1	1	1	1	1	0	1	0	0.87	2	2	3	2	3	2	3	2	2	3	2	3	2	2	2	2.33	0	1	1	2	2	2	1	2	2	1	1	1	1	1	1	1.27
ER-6	31	3	3	2	3	2	2	2	2	2	3	2	2	2	3	3	2.4	2	3	3	3	3	3	3	3	3	3	3	3	3	3	3	2.93	2	2	3	2	3	3	2	3	2	3	2	3	2	3	2	2.47
ER-7	32	2	2	1	2	2	2	2	2	2	2	2	2	2	2	1	1.87	3	3	3	3	2	3	3	3	3	3	3	3	3	2	3	2.87	2	3	2	3	3	2	2	3	2	1	2	2	2	2	3	2.27
ER-8	33	0	2	2	1	1	2	2	1	2	2	2	2	2	3	3	1.8	2	3	3	3	2	3	3	2	2	3	2	2	3	2	2	2.47	0	1	1	1	1	1	0	1	2	1	2	2	1	2	1	1.13
ER-9	34	1	2	1	2	2	2	2	1	2	2	1	2	1	2	1	1.6	2	2	3	2	3	3	3	3	3	3	3	3	3	2	3	2.73	2	2	2	1	2	2	2	2	2	2	2	2	2	2	2	1.93
ER-10	35	1	1	1	1	1	0	1	0	2	2	2	1	1	1	2	1.13	2	1	2	2	1	1	2	2	2	1	3	2	2	2	2	1.8	0	0	2	1	0	0	0	1	0	0	0	0	1	0	0	0.33
ER-11	36	2	2	2	2	2	2	2	2	2	2	2	2	2	2	2	2	3	3	3	3	3	2	3	3	3	3	3	3	3	3	3	2.93	2	2	2	1	1	1	2	2	1	2	3	1	1	2	2	1.67
ER-12	37	2	2	3	3	2	2	2	3	2	2	2	2	2	2	2	2.2	3	3	3	3	3	3	3	2	3	2	3	3	3	3	3	2.87	1	1	1	1	1	1	1	2	1	1	1	0	1	1	0	0.93
ER-13	38	1	1	1	0	1	1	2	1	1	1	1	2	2	2	2	1.27	2	1	2	2	2	2	2	2	2	3	2	2	2	2	2	2	1	1	2	1	1	2	2	1	2	2	1	2	2	2	1	1.53
Ctrl-1	1	1	1	2	1	2	1	2	2	2	1	1	0	1	2	2	1.4	2	3	3	2	3	2	3	3	3	3	2	2	3	3	2	2.6	1	1	2	1	2	2	2	1	1	2	2	1	1	1	2	1.47
Ctrl-2	2	1	1	2	2	1	2	2	2	2	2	1	2	1	1	2	1.6	2	3	3	3	3	3	2	2	2	2	2	3	2	3	2	2.47	2	2	1	1	2	1	1	1	2	1	2	1	1	1	1	1.33
Ctrl-3	3	1	1	0	0	1	1	0	1	0	0	0	1	1	0	0	0.47	0	1	1	0	1	0	1	2	1	1	1	2	1	1	1	0.93	0	0	0	0	0	0	0	0	0	0	0	0	1	2	0	0.2
Ctrl-5	4	0	1	0	0	1	0	1	1	0	0	0	1	0	0	1	0.4	1	1	1	2	1	1	2	2	1	2	1	2	2	2	2	1.53	0	1	0	0	0	0	0	0	0	0	0	0	1	0	0	0.13
Ctrl-6	5	1	1	2	1	1	2	1	1	1	1	1	1	1	1	2	1.2	1	2	2	3	2	2	2	2	2	2	3	2	2	2	3	2.13	1	1	2	1	1	2	1	2	1	2	1	1	2	1	1	1.33
Ctrl-7	6	0	0	1	0	0	0	0	0	0	0	0	0	0	0	0	0.07	0	1	1	1	1	2	1	2	1	1	0	0	1	0	0	0.8	0	0	0	0	0	0	0	0	0	0	0	0	0	0	0	0
Ctrl-8	7	1	1	1	1	2	1	1	2	1	1	2	1	1	1	0	1.13	1	1	1	1	2	1	2	2	2	1	1	2	2	2	3	1.6	0	1	1	1	2	1	1	1	1	2	2	2	2	1	2	1.33
Ctrl-10	8	1	1	2	1	2	1	2	2	1	2	1	2	2	2	2	1.6	1	2	2	2	3	3	2	2	2	2	1	2	2	3	3	2.13	1	2	2	1	1	0	1	1	1	1	0	1	1	1	0	0.93
[truncated: 16 more columns]

## Sheet: CFD score
	specimen ID	Pt.	kidney					lung
			compartments [score 0-3]				sum score [0-12]	compartments [score 0-3]					sum score [0-15]
			peritubular capillaries (total)	arterial (total	glomerular (total)	tubular basement membrane (total)		alveolar septa	alveolar infiltrate	alveolar lumen	bronchioles	vessels
	A-1/-37	1	0	1	0	0	1	1	1	0	0	1	3
	A-3/-39	2	1	0	0	1	2	2	2	1	3	1	9
	A-4/-40	3	2	2	1	3	7	3	2	2	3	1	11
	A-5/-41	4	2	2	0	2	6	3	3	2	2	1	11
	A-6/-42	5	0	1	1	1	3	1	3	1	1	1	7
	A-7/-43	6	1	2	3	2	8	2	2	1	2	0	7
	A-8/-44	7	1	3	1	2	7	1	1	0	0	1	3
	A-9/-45	8	0	2	0	0	2	2	1	0	1	1	5
	A-10/-46	9	2	2	0	2	6	2	2	1	1	0	6
	A-13/-49	10	2	1	0	2	5	2	2	1	0	0	7
	A-14/-50	11	1	2	0	2	5	2	1	0	0	1	4
	A-15/-51	12	0	1	1	0	2	specimen missing
	A-16/-52	13	1	1	1	1	4	3	1	1	1	1	7
	A-17/-53	14	1	2	1	1	5	3	2	1	2	1	9
	A-18/-54	15	0	1	1	0	2	1	2	0	2	0	5
	A-19/-55	16	2	1	1	1	5	1	2	0	1	0	4
	A-21/-57	17	0	1	0	0	1	2	3	0	2	0	7
	A-23/-59	18	2	1	1	2	6	1	2	0	2	0	5
	A-24/-60	19	2	1	0	1	4	1	2	0	3	2	8
	A-25/-61	20	1	1	1	1	4	3	2	1	3	1	10
	A-27/-63	21	1	1	1	1	4	3	2	1	3	1	10
	A-31/-67	22	2	3	2	3	10	2	1	2	0	2	7
	A-33/-69	23	2	2	0	2	6	1	2	1	2	1	7
	A-35/-71	24	2	1	1	2	6	0	2	0	0	1	3
	A-36/-72	25	2	2	0	2	6	3	1	1	0	0	5
	ER-1	26	1	2	2	2	7	3	0	2	0	1	6
	ER-2	27	2	3	2	2	9	0	2	0	2	0	4
	ER-3	28	1	0	0	1	2	0	0	0	0	0	0
	ER-4	29	1	2	1	1	5	2	2	2	0	0	6
	ER-5	30	1	1	2	2	6	no alveolar tissue
	ER-6	31	2	3	1	3	9	2	2	1	2	1	8
	ER-7	32	2	2	1	2	7	2	2	1	2	1	8
	ER-8	33	1	1	0	2	4	3	2	2	0	1	8
	ER-9	34	1	2	2	0	5	no alveolar tissue
	ER-10	35	1	1	1	2	5	2	1	1	0	1	5
	ER-11	36	1	2	2	2	7	1	2	0	2	2	7
	ER-12	37	1	3	2	1	7	3	0	2	1	1	7
	ER-13	38	2	2	2	2	8	2	2	1	2	1	8
	Ctrl-1	1	1	1	1	1	4	0	2	0	0	2	4
	Ctrl-2	2	2	2	1	2	7	0	1	0	2	1	4
	Ctrl-3	3	1	1	2	2	6	0	1	0	1	0	2
	Ctrl-5	4	0	2	2	1	5	0	2	0	3	1	6
	Ctrl-6	5	1	2	1	1	5	0	1	0	0	1	2
	Ctrl-7	6	1	1	1	2	5	0	1	0	1	1	3
	Ctrl-8	7	0	2	1	0	3	no alveolar tissue
	Ctrl-10	8	1	1	2	2	6	0	2	1	2	2	7

## Sheet: MPO score
specimen ID	Pt.	kidney					lung
		compartments [score 0-2]				sum score [0-8]	compartments				sum score [0-12]
		infiltrate	peritubular capillaries	glomerular	tubules		alveolar septa [score 0-4]	alveolar infiltrate [score 0-2]	bronchioles [score 0-4]	vessels [score 0-2]
A-1/-37	1	1	1	1	1	4	0	0	0	1	1
A-3/-39	2	0	1	1.5	1	3.5	2	1.5	/	1	4.5
A-4/-40	3	0	2	0.5	1	3.5	2	0	2.5	0.5	5
A-5/-41	4	0	2	1.5	1	4.5	2	1.5	1	0.5	5
A-6/-42	5	0	1	1.5	1	3.5	1	1.5	2		4.5
A-7/-43	6	1	2	0	2	5	3	0.5	2	1	6.5
A-8/-44	7	0	1	1.5	0	2.5	1.5	0	/	1	2.5
A-9/-45	8	1	2	1	1	5	1.5	0	0	1.5	3
A-10/-46	9	1	2	1	2	6	1	1.5	0.5	1.5	4.5
A-13/-49	10	0	1	1	1	3	2	0.5	0	0.5	3
A-14/-50	11	0	0.5	0.5	1	2	0.5	0.5	/	0.5	1.5
A-15/-51	12	0	0.5	1	1	2.5	specimen missing
A-16/-52	13	0	2	1.5	2	5.5	1	1.5	3	0.5	6
A-17/-53	14	0	1	1	1	3	0.5	0.5	2	1.5	4.5
A-18/-54	15	0	2	1	1	4	1.5	1.5	1.5	1	5.5
A-19/-55	16	0	1	0.5	0	1.5	2	2	2	1.5	7.5
A-21/-57	17	0	1.5	0.5	1	3	0	0.5	2.5	0.5	3.5
A-23/-59	18	0	1	0.5	2	3.5	1	2	2.5	1	6.5
A-24/-60	19	0	1	1	0	2	1	0	2	1	4
A-25/-61	20	0	0.5	0.5	0	1	0.5	1.5	1	0.5	3.5
A-27/-63	21	0	0.5	1	1	2.5	2	0.5	0	1.5	4
A-31/-67	22	0	0.5	0.5	0	1	0.5	1.5	1	1	4
A-33/-69	23	0	1	1	1.5	4.5	2.5	0	2	0.5	5
A-35/-71	24	0	0.5	0.5	1	2	2	0	0	0	2
A-36/-72	25	0	0.5	0.5	0	1	1.5	0.5	2	0.5	4.5
ER-1	26	0	0	1	0	1	1.5	1.5	2	0.5	5.5
ER-2	27	0	0	0.5	1	1.5	1.5	1.5	2	0.5	5.5
ER-3	28	0	1	1	1	3	1	0	0.5	0.5	1.5
ER-4	29	0	0.5	0	0	0.5	2.5	1.5	/	0.5	4.5
ER-5	30	0	1	1	1	3	no alveolar tissue
ER-6	31	0	1	1	2	4	1.5	1	1.5	0.5	4.5
ER-7	32	0	0.5	0.5	1	2	1.5	0	1	1.5	4
ER-8	33	0	1	0.5	0	1.5	1.5	1.5	2	0.5	5.5
ER-9	34	0	0.5	0.5	0	1	no alveolar tissue
ER-10	35	0	0	1.5	0	1.5	1.5	0	0	0.5	2
ER-11	36	0	0	1	1	2	0.5	0	0.5	1	2
ER-12	37	0	0	0.5	0	0.5	2.5	0	1	1	4.5
ER-13	38	0	2	1	1	4	1	1.5	2	1.5	6
Ctrl-1	1	2	0.5	0.5	1	4	0.5	0.5	/	0.5	1.5
Ctrl-2	2	0	0.5	0.5	0	1	0	0	/	0.5	0.5
Ctrl-3	3	0	0.5	0.5	0	1	1	0.5	2	1	4.5
Ctrl-5	4	0	0	0.5	0	0.5	0.5	0	0	0.5	1
Ctrl-6	5	1	0.5	0.5	1	3	0.5	0.5	0	0.5	1.5
Ctrl-7	6	0	0.5	0.5	0	1	0.5	0	/	1.5	2
Ctrl-8	7	0	2	0.5	0	2.5	no alveolar tissue
Ctrl-10	8	0	0.5	1	0	1.5	1.5	0	1	1	3.5
